# Supplementary material
Source: HighWire-hosted journal article supplement (https://openres.ersjournals.com/content/9/3/00538-2022)
Supplement: inline-supplementary-material-1 [file inline-supplementary-material-1.pdf]

## Exercise intolerance in post-COVID19 survivors after hospitalization

### Online Data Supplement

Mariana L Lafetá<sup>1</sup>, Vitor C Souza<sup>1</sup>, Thaís C F Menezes<sup>1</sup>, Carlos G Y Verrastro<sup>5</sup>, Frederico J Mancuso<sup>2</sup>, André Luis P Albuquerque<sup>4</sup>, Suzana E Tanni<sup>3</sup>, Meyer Izbicki<sup>1</sup>, Júlio P Carlstron<sup>1</sup>, Luiz Eduardo Nery<sup>1</sup>, Rudolf K F Oliveira<sup>1</sup>, Priscila A Sperandio<sup>1</sup>, Eloara V M Ferreira<sup>1</sup>

<sup>1</sup> Pulmonary Function and Clinical Exercise Physiology Unit (SEFICE), Division of Respiratory Diseases, Federal University of Sao Paulo (UNIFESP), Sao Paulo, Brazil

<sup>2</sup> Division of Cardiology, Federal University of Sao Paulo (UNIFESP), Sao Paulo, Brazil

<sup>3</sup> Division of Internal Medicine of Botucatu Medical School, São Paulo State University-UNESP, Botucatu, Brazil.

<sup>4</sup> Pulmonary Division, Heart Institute (INCOR), Clinical Hospital HCFMUSP, Faculty of the Medicine University of Sao Paulo, Sao Paulo, Brazil; Sírio-Libanês Teaching and Research Institute, São Paulo, Brazil

<sup>5</sup> Radiology Division, Federal University of Sao Paulo (UNIFESP), Sao Paulo, Brazil

## Material and Methods

### ***Pulmonary function test and modified Medical Council Research (mMRC):***

Pulmonary function test included spirometry (FVC, FEV1, FEV1/FVC), static lung volumes (TLC, RV) and diffusing capacity of lungs for carbon monoxide (DLCO and VA) were performed by using the Elite DX Body Plethysmography (MedGraphics, MGC, St Paul, MO, USA) with flow measurements carried out with a calibrated pneumotachograph (Pitot tube) and DLCO was measured by the modified Krogh technique (single breath)[13, 14].

The mMRC dyspnea scale was used as a self-assessment tool to measure the degree of breathlessness in activities of daily living on a scale from 0 to 4. Participants were categorized as having dyspnea by mMRC scale (1-4) or no dyspnea (0). [15]

### ***Cardiopulmonary Exercise Testing (CPET)***

The following measures were obtained: O<sub>2</sub> uptake ( $\dot{V}O_2$ , L/min), carbon dioxide (CO<sub>2</sub>) output ( $\dot{V}CO_2$ , L/min), minute ventilation ( $\dot{V}E$ , L/min), the respiratory exchange ratio (RER,  $\dot{V}CO_2/\dot{V}O_2$ ), end-tidal partial pressures for CO<sub>2</sub> (PETCO<sub>2</sub>, mmHg) and O<sub>2</sub> (PETO<sub>2</sub>, mmHg), respiratory rate (RR, breaths/min) and tidal volume (VT, L). The  $\dot{V}O_{2\text{PEAK}}$  was compared to previously established standards (22) and calculated according to the average of the last 20 seconds before peak exercise. The anaerobic threshold (AT) was identified using the modified V-slope method and confirmed with the ventilatory method (23). Delta  $\dot{V}E$  to  $\Delta\dot{V}CO_2$  ratio ( $\Delta\dot{V}E/\Delta\dot{V}CO_2$ ) was calculated as a slope from the start of work rate (WR) to the respiratory compensation point (RCP). Reasons for considering a maximal test were a  $\dot{V}O_2$  plateau; a RER  $\geq 1.10$ ; the peak of heart rate (HR)  $\geq 85\%$  pred or a rate of perceived exertion  $\geq 5$  on the Borg scale. An electrocardiogram was continuously monitored during CPET. Cuff systemic blood pressure at each 2 min and pulse oximetry (SpO<sub>2</sub>%) were observed and recorded.

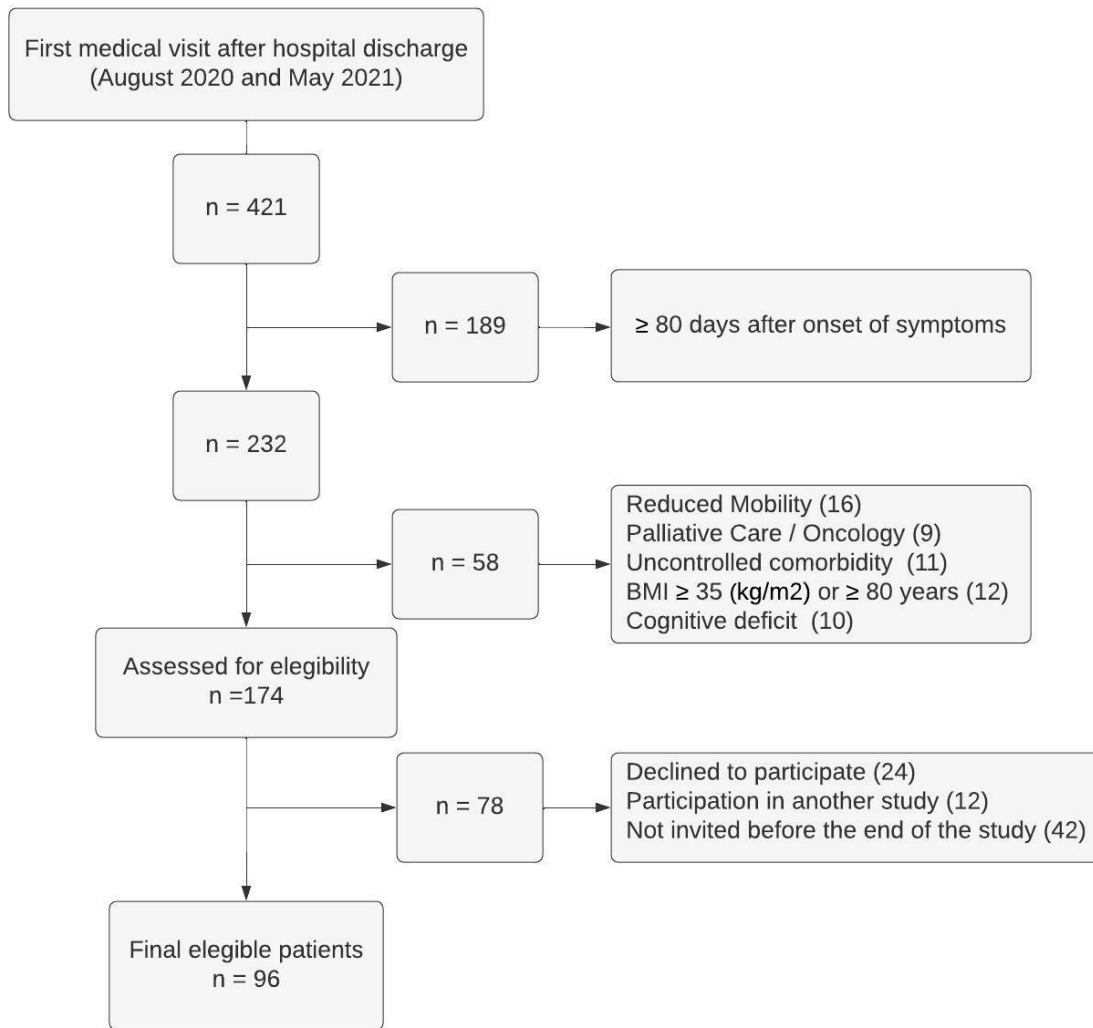

**Figure E1. Enrollment of patients at first medical visit after hospital discharge.**

**Table E1.** Comorbidities, medications of continuous use and symptoms of hospital admission during hospitalization for COVID19.

|                            | Total (n=87) |                                      | Total (n=87) |
|----------------------------|--------------|--------------------------------------|--------------|
| Comorbidities              |              | Acute symptoms at hospital admission |              |
| Systemic hypertension      | 45 (52)      | Dyspnea                              | 67 (77)      |
| Ex-Smoker                  | 29 (33)      | Fever                                | 61 (70)      |
| Obesity                    | 24 (28)      | Cough                                | 59 (68)      |
| Diabetes                   | 21 (24)      | Myalgia                              | 52 (60)      |
| Hyperlipidemia             | 11 (13)      | Headache                             | 28 (32)      |
| Asthma                     | 8 (9)        | Anosmia                              | 27 (31)      |
| Chronic kidney disease     | 8 (9)        | Dysgeusia                            | 20 (23)      |
| Psychiatric diseases       | 9 (10)       | Diarrhea                             | 14 (16)      |
| Kidney transplant          | 8 (9)        | Nausea/Vomiting                      | 12 (14)      |
| No comorbidity             | 6 (7)        | Fatigue                              | 9 (10)       |
| One comorbidity            | 25 (29)      |                                      |              |
| <b>Chronic medications</b> |              |                                      |              |
| ARB/ACEi                   | 37 (43)      |                                      |              |
| Oral hypoglycemic          | 20 (23)      |                                      |              |
| Diuretic                   | 19 (22)      |                                      |              |
| Lipid-lowering agent       | 17 (20)      |                                      |              |
| Beta blockers              | 14 (16)      |                                      |              |
| Antiaggregant              | 11 (13)      |                                      |              |
| Antidepressants            | 9 (10)       |                                      |              |
| LABA+IC                    | 7 (8)        |                                      |              |
| Insulin                    | 6 (7)        |                                      |              |
| Immunosuppressants         | 3 (3)        |                                      |              |
| No medicine                | 21 (24)      |                                      |              |

Data are presented as absolute value and percentage (*n* %). *Abbreviation:* ARB: angiotensin-receptor blocker; ACEi: angiotensin-converting enzyme inhibitor; LABA: long-acting beta-agonists; IC: inhaled corticosteroids.

**Table E2.** Correlation coefficients for  $_{\text{PEAK}} \dot{V}\text{O}_2$  (ml/kg/min)

|                                                              | <i>r</i> | <i>p</i><br>Values |
|--------------------------------------------------------------|----------|--------------------|
| $_{\text{PEAK}} \dot{V}\text{O}_2$ , ml/kg/min               |          |                    |
| Age, yrs                                                     | -0.41    | <0.001             |
| Comorbidities, <i>n</i>                                      | -0.41    | <0.001             |
| Hospitalized days, <i>n</i>                                  | -0.07    | 0.511              |
| Days in ICU, <i>n</i>                                        | -0.10    | 0.485              |
| Dyspnea, mMRC                                                | -0.42    | <0.001             |
| FVC, % pred                                                  | 0.25     | 0.029              |
| DLCO, % pred                                                 | 0.35     | 0.011              |
| Peak $\dot{V}\text{E}/\text{MVV}$                            | 0.38     | <0.001             |
| Peak VT, L                                                   | 0.61     | <0.001             |
| Peak RR/VT                                                   | -0.36    | <0.001             |
| $\Delta\dot{V}\text{E}/\Delta\dot{V}\text{CO}_{2\text{RCP}}$ | -0.45    | <0.001             |
| Peak VD/VT                                                   | -0.44    | <0.001             |
| Peak P(A-a) $\text{O}_2$ , mmHg                              | -0.07    | 0.553              |
| Peak P(a-ET) $\text{CO}_2$ , mmHg                            | -0.35    | 0.003              |
| Peak WR, watts                                               | 0.78     | <0.001             |
| $\Delta\dot{V}\text{O}_2/\Delta\text{WR}$ , ml/min/watts     | 0.35     | 0.001              |
| Peak Lactate, mmol/L                                         | 0.53     | <0.001             |
| Peak Lactate/WR, mmol/L/watts                                | -0.39    | 0.001              |
| Peak $\text{CaO}_2$ , mL/dL                                  | 0.30     | 0.012              |

*Definition of abbreviation:* ICU: intensive care unit; mMRC: modified Medical Research Council; FVC: forced vital capacity; DLCO: diffusing capacity of the lung for carbon monoxide;  $\dot{V}\text{E}$ : minute ventilation; MVV: maximal voluntary ventilation; RR: respiratory rate; VT: tidal volume;  $\text{CaO}_2$ : oxygen content in arterial blood; P(A-a)  $\text{O}_2$ : alveolar-arterial oxygen difference; VD/VT: dead space fraction of tidal volume; P(a-ET) $\text{CO}_2$ : arterial to End-tidal carbon dioxide difference; WR: work rate;  $\text{PaCO}_2$ : partial arterial pressure for carbon dioxide;  $\text{PaO}_2$ : arterial partial pressure of oxygen; Chest CT: percentage of lung parenchyma involvement. \*The correlation is significant at the 0.05 level (2 ends); \*\* The correlation is significant at the 0.01 level (2 ends).

**Table E3.** Areas under the ROC curve for determining the cutoff for lung function and exercise variables for  $PEAK V'O_2 \leq 17.0 \text{ ml/kg/min}$ .

|                                                            | Cutoff values | Area under curve (%) | IC 95%      | p - value |
|------------------------------------------------------------|---------------|----------------------|-------------|-----------|
| <b><math>PEAK V'O_2 \leq 17.0 \text{ ml/kg/min}</math></b> |               |                      |             |           |
| mMRC                                                       | 1             | 0.71                 | 0.59 – 0.82 | 0.001     |
| FVC, % pred                                                | 80            | 0.70                 | 0.57 – 0.84 | 0.005     |
| DLCO, % pred                                               | 65            | 0.75                 | 0.59 – 0.92 | 0.004     |
| Peak $V'E/MVV$                                             | 0.50          | 0.68                 | 0.55 – 0.80 | 0.006     |
| Peak RR/VT                                                 | 40            | 0.70                 | 0.58 – 0.82 | 0.002     |
| $\Delta V'E/\Delta V'CO_{2RCP}$                            | 32            | 0.74                 | 0.63 – 0.85 | <0.001    |
| Peak VD/VT                                                 | 29            | 0.80                 | 0.68 – 0.91 | <0.001    |
| Peak $P(a-ET)CO_2$ , (mmHg)                                | 2.65          | 0.79                 | 0.65 – 0.90 | <0.001    |
| Peak WR, watts                                             | 105           | 0.89                 | 0.83 – 0.96 | <0.001    |
| $\Delta V'O_2/\Delta WR$ , mL/min/watts                    | 11.5          | 0.69                 | 0.56 – 0.81 | 0.005     |
| Peak Lactate, mmol/L                                       | 5.75          | 0.74                 | 0.61 – 0.86 | 0.002     |
| Peak Lactate/WR, (mmol/L/watts)                            | 0.075         | 0.75                 | 0.62 – 0.89 | 0.001     |
| Peak $CaO_2$ , mL/dL                                       | 21.5          | 0.67                 | 0.52 – 0.82 | 0.025     |

*Definition of abbreviation:* mMRC: modified Medical Research Council; FVC: forced vital capacity; DLCO: diffusing capacity of the lung for carbon monoxide;  $V'E$ : minute ventilation; MVV: maximal voluntary ventilation; RR: respiratory rate; VT: tidal volume;  $V'CO_2$ : carbon dioxide production; VD/VT: dead space fraction of tidal volume;  $P(a-ET)CO_2$ : arterial to End-tidal carbon dioxide difference; WR= work rate (watts).

**Table E4.** Multivariate logistic analysis adjusted for sex, age and any comorbidities for  $\text{PEAK V'O}_2 \leq 17.0 \text{ ml/kg/min}$  according to persistence of symptoms, lung function and CPET variables.

| Variables              |                                        | MULTIVARIATE    |       |               |
|------------------------|----------------------------------------|-----------------|-------|---------------|
|                        |                                        | <i>p</i> Values | Odds  | IC            |
| Symptoms               | mMRC $\geq 1$                          |                 |       |               |
| Lung Function          | FVC $\leq 80$ , % pred                 | 0.009           | 45.41 | 2.58 – 796.95 |
| CPET                   |                                        |                 |       |               |
| Ventilatory responses  | Peak RR/VT $\geq 40$                   |                 |       |               |
| Gas-exchange responses | Peak VD/VT $\geq 29$                   | 0.007           | 53.91 | 3.02 – 962.81 |
| Metabolic responses    | Lactate/WR $\geq 0.075$ , mmol/L/watts |                 |       |               |

*Definition of abbreviation:* mMRC: modified Medical Research Council; FVC: forced vital capacity; RR: respiratory rate; VT: tidal volume; VD/VT= dead space fraction of tidal volume; WR: work rate (watts). Multivariate logistic analysis corrects by age, sex and comorbidities, with  $R^2 = 0.55$ . Cutoff point of the variables defined by ROC Curve.
